# Supplementary material
Source: PubMed Central journal article supplement (PMC1472596)
Supplement: jvirol_80_12_6171__1.pdf [file jvirol_80_12_6171__1.pdf]

**Table 2.** Measured masses and assignments of tryptic peptides from VP3 protein.

| <i>m/z</i> (obs'd) | Charge | M (obs'd) | M (calc) | Error (ppm) | Assignment |
|--------------------|--------|-----------|----------|-------------|------------|
| 521.8243           | 2      | 1041.634  | 1041.634 | 0           | 439-447    |
| 540.9454           | 3      | 1619.814  | 1619.810 | 3           | 44-56      |
| 593.6351           | 3      | 1777.883  | 1777.871 | 7           | 258-273    |
| 604.9608           | 3      | 1811.861  | 1811.859 | 1           | 491-504    |
| 617.8068           | 2      | 1233.599  | 1233.591 | 6           | 355-364    |
| 625.8014           | 2      | 1249.588  | 1249.590 | -1          | 246-257    |
| 641.5767           | 4      | 2562.278  | 2562.248 | 11          | 343-364    |
| 645.3524           | 2      | 1288.690  | 1288.682 | 7           | 408-418    |
| 647.2969           | 4      | 2585.159  | 2585.153 | 2           | 289-311    |
| 652.6666           | 3      | 1954.978  | 1954.968 | 5           | 326-342    |
| 670.3733           | 2      | 1338.732  | 1338.734 | -1          | 331-342    |
| 678.6766           | 3      | 2033.008  | 2032.999 | 4           | 348-364    |
| 679.8733           | 2      | 1357.732  | 1357.726 | 5           | 97-107     |
| 680.6585           | 3      | 2038.954  | 2038.927 | 13          | 312-330    |
| 712.3603           | 2      | 1422.706  | 1422.693 | 9           | 312-325    |
| 715.6965           | 3      | 2144.068  | 2144.063 | 2           | 419-438    |
| 753.3803           | 4      | 3009.492  | 3009.450 | 14          | 246-273    |
| 759.3988           | 1      | 758.3915  | 758.3824 | 1           | 306-311    |
| 777.4555           | 1      | 776.4483  | 776.4392 | 1           | 37-43      |
| 801.9192           | 2      | 1601.824  | 1601.805 | 1           | 448-463    |
| 810.9228           | 2      | 1619.831  | 1619.810 | 1           | 44-56      |
| 828.8973           | 2      | 1655.780  | 1655.758 | 1           | 492-504    |
| 841.7695           | 3      | 2522.287  | 2522.240 | 18          | 505-527    |
| 861.5302           | 1      | 860.5229  | 860.5120 | 1           | 113-119    |
| 889.9549           | 2      | 1777.895  | 1777.871 | 1           | 258-273    |
| 923.4107           | 2      | 1844.807  | 1844.781 | 1           | 289-305    |
| 951.5087           | 2      | 1901.003  | 1900.976 | 1           | 231-245    |
| 959.5042           | 2      | 1916.994  | 1916.971 | 1           | 231-245+O  |
| 972.5123           | 2      | 1943.010  | 1942.991 | 1           | 93-107     |
| 978.5068           | 2      | 1954.999  | 1954.968 | 2           | 326-342    |
| 1017.517           | 2      | 2033.019  | 2032.999 | 1           | 348-364    |
| 1025.519           | 2      | 2049.024  | 2048.994 | 1           | 348-364+O  |
| 1033.528           | 2      | 2065.041  | 2065.008 | 2           | 365-383    |
| 1050.207           | 3      | 3147.601  | 3147.540 | 2           | 464-490    |
| 1073.058           | 2      | 2144.102  | 2144.063 | 2           | 419-438+O  |
| 1081.056           | 2      | 2160.097  | 2160.057 | 2           | 419-438+O  |
| 1085.508           | 3      | 3253.502  | 3253.437 | 2           | 203-230    |
| 1094.532           | 3      | 3280.574  | 3280.588 | 3           | 355-383    |
| 1102.243           | 3      | 3303.708  | 3303.641 | 2           | 464-481    |
| 1126.241           | 3      | 3375.702  | 3375.645 | 2           | 312-342+O  |
| 1176.617           | 3      | 3526.830  | 3526.767 | 2           | 387-418    |

|          |   |          |          |     |           |
|----------|---|----------|----------|-----|-----------|
| 1181.939 | 3 | 3542.796 | 3542.767 | 0.8 | 387-418+O |
| 1234.618 | 1 | 1233.611 | 1233.591 | 2   | 246-257   |
| 1262.154 | 2 | 2522.295 | 2522.240 | 2   | 505-527   |
| 1339.758 | 1 | 1338.750 | 1338.734 | 1   | 331-342   |
| 1358.765 | 1 | 1357.758 | 1357.726 | 2   | 97-107    |

**Table 3.** Measured masses and assignments of peptides from a Glu-C digest of VP3 protein. \*C-terminal peptide of VP3.

| <b><i>m/z</i> (obs'd)</b> | <b>Charge</b> | <b>M (obs'd)</b> | <b>M (calc)</b> | <b>Error (ppm)</b> | <b>Assignment</b> |
|---------------------------|---------------|------------------|-----------------|--------------------|-------------------|
| 726.0334                  | 3             | 2175.078         | 2175.073        | 0.3                | 354-372+O         |
| 731.3601                  | 3             | 2191.058         | 2191.068        | 4                  | 354-372+O         |
| 890.1399                  | 3             | 2667.398         | 2667.391        | 0.3                | 330-353           |
| 1088.550                  | 2             | 2175.086         | 2175.073        | 0.6                | 354-372           |
| 1182.890                  | 3             | 3545.648         | 3545.627        | 0.6                | 298-329           |
| 1465.744                  | 3             | 4394.210         | 4394.193        | 0.4                | 496-533*          |

**Table 4.** Measured masses and assignments of peptides from an Asp-N digest of VP3 protein.

| <i>m/z</i> (obs'd) | Charge | M (obs'd) | M (calc)  | Error (ppm) | Assignment |
|--------------------|--------|-----------|-----------|-------------|------------|
| 525.5794           | 3      | 1573.716  | 1573.716  | 0           | 215-228    |
| 579.9840           | 3      | 1736.930  | 1736.925  | 3           | 408-422    |
| 671.8465           | 4      | 2683.357  | 2683.349  | 3           | 327-350    |
| 700.6062           | 4      | 2798.396  | 2798.376  | 7           | 326-350    |
| 712.3602           | 2      | 1422.706  | 1422.693  | 9           | 312-325    |
| 720.3633           | 2      | 1438.712  | 1438.687  | 2           | 312-325+O  |
| 722.7661           | 5      | 3608.794  | 3608.797  | 2           | 35-66      |
| 772.3831           | 2      | 1542.752  | 1542.750  | 1           | 392-405    |
| 776.3668           | 3      | 2326.079  | 2326.036  | 2           | 292-311    |
| 787.8791           | 2      | 1573.744  | 1573.716  | 2           | 215-228    |
| 869.4880           | 2      | 1736.961  | 1736.925  | 2           | 408-422    |
| 877.3810           | 2      | 1752.747  | 1752.7208 | 2           | 67-80      |
| 902.4563           | 4      | 3605.796  | 3605.731  | 2           | 359-391    |
| 903.2048           | 4      | 3608.790  | 3608.797  | 2           | 35-66      |
| 933.8048           | 3      | 2798.393  | 2798.376  | 6           | 326-350    |
| 948.5305           | 1      | 947.5232  | 947.4997  | 2           | 351-358    |
| 971.5481           | 1      | 970.5408  | 970.5270  | 1           | 229-236    |
| 1114.560           | 3      | 3340.658  | 3340.596  | 2           | 237-266    |
| 1202.953           | 3      | 3605.837  | 3605.731  | 3           | 359-391    |

**Table 5.** Measured masses and assignments of tryptic peptides from VP1 protein.

| <i>m/z</i> (obs'd) | Charge | M (obs'd) | M (calc) | Error (ppm) | Assignment |
|--------------------|--------|-----------|----------|-------------|------------|
| 521.8238           | 2      | 1041.633  | 1041.634 | -1          | 641-649    |
| 537.0238           | 4      | 2144.066  | 2144.063 | 2           | 621-640    |
| 540.9538           | 3      | 1619.839  | 1619.810 | 2           | 246-258    |
| 593.6422           | 3      | 1777.905  | 1777.871 | 2           | 460-475    |
| 617.8147           | 2      | 1233.615  | 1233.591 | 2           | 557-566    |
| 622.6506           | 3      | 1864.930  | 1846.892 | 2           | 144-161    |
| 625.3182           | 2      | 1248.622  | 1248.599 | 2           | 82-92      |
| 626.0351           | 3      | 1875.084  | 1875.071 | 6           | 125-142    |
| 645.3608           | 2      | 1288.707  | 1288.682 | 2           | 610-620    |
| 652.6692           | 3      | 1954.986  | 1954.968 | 9           | 528-544    |
| 655.9327           | 5      | 3274.627  | 3274.553 | 2           | 52-81      |
| 659.8418           | 2      | 1317.669  | 1317.657 | 10          | 10-20      |
| 665.3868           | 3      | 1993.139  | 1992.986 | 8           | 143-161    |
| 668.7276           | 3      | 2003.161  | 2003.167 | -3          | 125-143    |
| 670.3794           | 2      | 1338.744  | 1338.734 | 1           | 533-544    |
| 679.8719           | 2      | 1357.729  | 1357.726 | 4           | 315-321    |
| 690.3176           | 2      | 1378.621  | 1378.590 | 2           | 93-103     |
| 692.4082           | 2      | 1382.802  | 1382.803 | -1          | 25-37      |
| 693.3431           | 4      | 2769.343  | 2769.325 | 1           | 52-77      |
| 697.3695           | 2      | 1392.725  | 1392.670 | 2           | 104-116    |
| 711.4315           | 2      | 1420.848  | 1420.818 | 2           | 125-137    |
| 715.7110           | 3      | 2144.111  | 2144.063 | 2           | 621-640    |
| 721.0418           | 3      | 2160.104  | 2160.057 | 2           | 621-640+O  |
| 724.3345           | 3      | 2169.982  | 2169.993 | -5          | 62-81      |
| 801.9274           | 2      | 1601.840  | 1601.805 | 2           | 650-665    |
| 810.9304           | 2      | 1619.846  | 1619.769 | 5           | 93-105     |
| 814.3853           | 4      | 3253.512  | 3253.438 | 2           | 405-432    |
| 819.6638           | 4      | 3274.626  | 3274.553 | 2           | 52-81      |
| 824.8870           | 4      | 3295.519  | 3295.583 | -2          | 557-585    |
| 826.6648           | 4      | 3302.630  | 3302.641 | -0.3        | 666-693    |
| 828.8922           | 2      | 1655.770  | 1655.758 | 1           | 694-706    |
| 840.9394           | 4      | 3359.729  | 3359.650 | 2           | 514-544    |
| 841.7697           | 3      | 2522.287  | 2522.240 | 19          | 707-729    |
| 842.0933           | 3      | 2523.258  | 2523.231 | 11          | 448-471    |
| 844.9374           | 4      | 3375.721  | 3375.646 | 2           | 514-544+O  |
| 846.5116           | 1      | 845.504   | 845.501  | 4           | 44-51      |
| 851.4420           | 4      | 3401.739  | 3401.581 | 5           | 62-92      |
| 861.5160           | 1      | 860.509   | 860.512  | -4          | 315-321    |
| 889.9647           | 2      | 1777.915  | 1777.871 | 3           | 460-475    |
| 923.4194           | 2      | 1844.824  | 1844.781 | 3           | 491-507    |
| 951.5011           | 2      | 1900.988  | 1900.976 | 1           | 433-447    |

|          |   |          |          |     |           |
|----------|---|----------|----------|-----|-----------|
| 959.4977 | 2 | 1916.981 | 1916.981 | 0   | 433-447+O |
| 972.5057 | 2 | 1942.997 | 1942.997 | 0   | 295-309   |
| 1033.517 | 2 | 2065.020 | 2065.008 | 0.6 | 567-585   |
| 1050.193 | 3 | 3147.558 | 3147.540 | 0.6 | 666-692   |
| 1085.493 | 3 | 3253.458 | 3253.438 | 0.6 | 405-432   |
| 1094.542 | 3 | 3280.607 | 3280.607 | 0   | 557-585   |
| 1099.874 | 3 | 3296.600 | 3296.583 | 0.5 | 557-585+O |
| 1176.604 | 3 | 3526.789 | 3526.767 | 0.6 | 589-620   |
| 1181.940 | 3 | 3542.798 | 3542.762 | 1   | 589-620+O |

Table 6. Measured masses and assignments of peptides from a Glu-C digest of VP1 protein. \*C-terminal peptide of VP1.

| <i>m/z</i> (obs'd) | Charge | M (obs'd) | M (calc) | Error (ppm) | Assignment |
|--------------------|--------|-----------|----------|-------------|------------|
| 660.3329           | 1      | 659.3257  | 659.3126 | 2           | 68-78      |
| 667.8663           | 4      | 2667.436  | 2667.391 | 2           | 532-555    |
| 710.3400           | 5      | 3546.664  | 3546.627 | 1           | 500-531    |
| 713.5400           | 5      | 3562.664  | 3562.622 | 1           | 500-531+O  |
| 726.0454           | 3      | 2175.114  | 2175.073 | 2           | 556-574    |
| 731.3770           | 3      | 2191.109  | 2191.068 | 2           | 556-574+O  |
| 817.4869           | 1      | 816.4196  | 816.4181 | 2           | 549-555    |
| 835.6451           | 4      | 3338.551  | 3338.486 | 2           | 75-102     |
| 879.8644           | 5      | 4394.286  | 4394.286 | 2           | 698-735*   |
| 890.1570           | 3      | 2667.449  | 2667.391 | 2           | 532-555    |
| 891.6804           | 4      | 3562.692  | 3562.622 | 2           | 500-531+O  |
| 1088.574           | 2      | 2175.133  | 2175.073 | 3           | 556-574    |

Table 7. Measured masses and assignments of peptides from an Asp-N digest of VP1 protein.

| <i>m/z</i> (obs'd) | Charge | M (obs'd) | M (calc) | Error (ppm) | Assignment |
|--------------------|--------|-----------|----------|-------------|------------|
| 525.5774           | 3      | 1573.710  | 1573.716 | 4           | 417-430    |
| 579.9849           | 3      | 1736.933  | 1736.925 | 0.5         | 610-624    |
| 582.5182           | 4      | 2326.044  | 2326.044 | 0           | 494-513    |
| 612.8167           | 4      | 2447.238  | 2447.227 | 0.5         | 154-177    |
| 617.7981           | 2      | 1233.582  | 1233.578 | 0.3         | 87-96      |
| 700.6040           | 4      | 2798.387  | 2798.376 | 0.4         | 528-552    |
| 712.3570           | 2      | 1422.699  | 1422.693 | 0.5         | 514-527    |
| 720.3546           | 2      | 1438.695  | 1438.687 | 0.5         | 514-527+O  |
| 727.7191           | 3      | 2180.135  | 2180.127 | 0.4         | 40-59      |
| 772.3858           | 2      | 1542.757  | 1542.750 | 0.5         | 594-607    |
| 776.3635           | 3      | 2326.069  | 2326.044 | 11          | 494-513    |
| 780.3832           | 2      | 1558.752  | 1558.745 | 0.4         | 594-607+O  |
| 787.8687           | 2      | 1573.723  | 1573.716 | 0.4         | 417-430    |
| 816.7501           | 3      | 2447.228  | 2447.227 | 0.1         | 154-177    |
| 844.9689           | 6      | 5063.769  | 5063.767 | 0.1         | 107-153    |
| 869.4703           | 2      | 1736.926  | 1736.925 | 0.1         | 610-624    |
| 877.3684           | 2      | 1752.722  | 1752.721 | 0.1         | 269-282    |
| 895.4578           | 3      | 2683.352  | 2683.349 | 0.1         | 529-552    |
| 898.0952           | 3      | 2691.264  | 2691.263 | 0.02        | 184-212+O  |
| 902.4449           | 4      | 3605.750  | 3605.731 | 6           | 561-593    |
| 933.8001           | 3      | 2798.378  | 2798.376 | 0.1         | 528-552    |
| 941.9713           | 2      | 1881.928  | 1881.932 | -0.2        | 327-344    |
| 948.5051           | 1      | 947.4979  | 947.4997 | -0.2        | 553-560    |
| 971.5323           | 1      | 970.5250  | 970.5270 | -0.2        | 431-438    |
| 1091.070           | 2      | 2180.125  | 2180.127 | -0.08       | 40-59      |
| 1114.536           | 3      | 3340.586  | 3340.596 | -0.3        | 439-468    |
| 1346.634           | 2      | 2691.254  | 2691.263 | -0.3        | 184-212    |



**Table 8.** Putative glycopeptides from VP3 predicted by GlycoMod. Hex=hexose, HexNAc=N-acetylhexosamine, Deoxyhex=deoxyhexose, NeuGc= N-glycolylneuraminic acid

A. Tryptic digest.

| <b>m/z (obs'd)</b> | <b>Charge</b> | <b>M (obs'd)</b> | <b>M (calc)</b> | <b>Error (ppm)</b> | <b>Peptide</b> | <b>Glycoform</b>                       |
|--------------------|---------------|------------------|-----------------|--------------------|----------------|----------------------------------------|
| 552.5798           | 3             | 1654.718         | 1654.704        | 8                  | 487-491        | Hex <sub>2</sub> HexNAcDeoxyhex        |
| 685.9802           | 3             | 2054.919         | 2054.908        | 5                  | 312-325        | Hex <sub>2</sub> Deoxyhex <sub>2</sub> |
| 706.9896           | 3             | 2117.947         | 2117.959        | -5                 | 343-354        | HexHexNAc <sub>3</sub>                 |
| 770.6860           | 3             | 2309.036         | 2309.048        | -5                 | 44-56          | Hex <sub>3</sub> HexNAc                |
| 859.4062           | 3             | 2575.197         | 2575.178        | 7                  | 365-383        | HexNAcNeuGc                            |

B. Asp-N digest.

| <b>m/z (obs'd)</b> | <b>Charge</b> | <b>M (obs'd)</b> | <b>M (calc)</b> | <b>Error (ppm)</b> | <b>Peptide</b> | <b>Glycoform</b>                              |
|--------------------|---------------|------------------|-----------------|--------------------|----------------|-----------------------------------------------|
| 724.32869          | 4             | 2893.286         | 2893.280        | 2                  | 392-407        | Hex <sub>2</sub> HexNAc <sub>3</sub> Deoxyhex |
|                    |               |                  | 2893.280        | 2                  | 392-407 +O     | HexHexNAc <sub>3</sub> Deoxyhex <sub>2</sub>  |
| 733.3585           | 5             | 3661.756         | 3661.725        | 8                  | 509-533        | Hex <sub>3</sub> Deoxyhex <sub>2</sub>        |
| 785.0369           | 3             | 2352.089         | 2352.096        | -3                 | 125-142        | Hex <sub>2</sub> Deoxyhex                     |
| 790.3656           | 3             | 2368.075         | 2368.090        | -6                 | 125-142        | Hex <sub>3</sub>                              |
| 849.3896           | 4             | 3393.529         | 3393.518        | 3                  | 215-236        | Hex <sub>4</sub> HexNAc                       |
|                    |               |                  | 3393.527        | 1                  | 270-291        | HexNAcNeuGc <sub>2</sub>                      |
| 868.8996           | 2             | 1735.785         | 1735.769        | 9                  | 215-228        | Hex                                           |
| 915.6795           | 4             | 3658.689         | 3658.703        | -3                 | 326-350        | HexHexNAc <sub>2</sub> Deoxyhex <sub>2</sub>  |
| 916.4439           | 4             | 3661.746         | 3661.725        | 6                  | 509-533        | Hex <sub>3</sub> Deoxyhex <sub>2</sub>        |
